# Supplementary material for: Atomically dispersed Ru catalysts for polychlorinated aromatic hydrocarbon oxidation
Source: Royal Society of Chemistry journal article supplement (doi:10.1039/d2nr00955b), 2022-01-01
Supplement: d2nr00955b1.pdf [file d2nr00955b1.pdf]

## Atomically Dispersed Ru Catalysts for Polychlorinated Aromatic Hydrocarbons

### Oxidation

Shuai Yang <sup>a</sup>, Xinyang Li <sup>a</sup>, Jiawen Ma <sup>a</sup>, Haiwei Guo <sup>a\*</sup>, Yifeng Chen <sup>a</sup>, Zhao Chen <sup>a</sup>,  
Gengbo Ren <sup>a</sup>, Xiaodong Ma <sup>a\*</sup>

### General Information

#### Chemicals

WO<sub>3</sub> (Aladdin, 99.8%), WCl<sub>6</sub> (Aladdin, 99%), NbCl<sub>5</sub> (Aladdin, 99%) and ethanol (AR) were purchased from Tianjin Fengchuan Chemical Reagent Co., Ltd. (Tianjin, China), RuCl<sub>3</sub>, H<sub>2</sub>PtCl<sub>6</sub>·6H<sub>2</sub>O and PdCl<sub>2</sub> (Kemat Chemical Technology Co. Ltd., 99%). *o*-DCB and Toluene (Rhawn, 99.8%). All the chemicals were used as-received without further purification.

#### Experiments

In X-ray diffraction (XRD), the instrument was operated in the continuous mode at 40 kV and 100 mA to collect data in the 2θ range of 5° to 90° with a step size of 0.02°, and the scanning speed was 15°/min. TEM and HRTEM images were obtained from a JEM-2100 transmission electron microscope under the acceleration voltage of 200 kV. ac-HAADF-STEM images and Ce M4,5-edge EELS spectra were collected from FEI Titan 80-300 electron microscope equipped with a Gatan Enfium camera system. The XAS of Ce L3-edge was collected on the beamline 7-3 in Stanford Synchrotron Radiation Lightsource (SSRL). PALS spectra were recorded using a fast108 slow coincidence system at room temperature. X-Ray photoelectron spectroscopy (XPS) was tested by ThermoFischer, ESCALAB250Xi with the excitation source was Al Kα ray (HV = 1486.6 eV). All the spectra were calibrated using C 1s = 284.6 eV. H<sub>2</sub>-temperature-programmed reduction (H<sub>2</sub>-TPR) was carried

as the following procedure: 100 mg sample was pretreated at 300 °C and was then purged by He for 2 h. After cooling to 50 °C, 10% H<sub>2</sub>/Ar mixture (50 ml/min) was used for 0.5 h until the baseline is stable. The sample was then treated at 850 °C at a heating rate of 10 °C /min in the 10% H<sub>2</sub>/Ar flow. In CO-temperature-programmed desorption (CO-TPD), 100 mg sample was firstly pretreated at 200 °C and was then purged by He flow (30 ml/min) for 1 h. After cooling to 50 °C, 10% CO/He mixture (30 ml/min) was used for adsorption for 1 h until saturated followed by purging for another 1 h by He flow, and the desorption gas was detected by a thermal conductivity detector (TCD). Inductive coupled plasma (ICP) was tested by Agilent ICP-OES 700. Before testing, 5 mL concentrated nitric acid and 2 mL hydrochloric acid were added to the sample and heated at 180 °C for about 8 h.

*In situ* FT-IR on *o*-DCB reaction was recorded on a Bruker TENSOR II equipped with MCT detector and supported. All spectra were collected with a resolution of 4 cm<sup>-1</sup> in a CRCP-7070 IR cell. The sample was in the form of a thin self-supported wafer, approximately 10 mg in weight. The samples were pre-treated in vacuum before collecting background spectrum at 300 °C. During each test, *o*-DCB with 10% O<sub>2</sub>/N<sub>2</sub> was introduced, and the spectra were recorded at 100, 150, 200, 250, 300 °C. All the spectra were analysed by subtracting the background.

### Kinetic study

The conversion of *CB* (*x*) (the abbreviation of *o*-DCB) can be calculated by the following equation:

$$x (\%) = \left(1 - \frac{C_{\text{out}}}{C_{\text{in}}}\right) \times 100\% \quad (1)$$

Where  $C_{\text{in}}$  is the initial concentration of *CB*,  $C_{\text{out}}$  is the *CB* concentration in the outlet gas.

The rate of catalytic oxidation of *CB*,  $r$ , can be expressed by the following equation:

$$r = -\frac{d[CB]}{dt} = k[CB]^n [O_2]^p \quad (2)$$

Where  $[CB]$  and  $[O_2]$  are the concentration of *o*-DCB and O<sub>2</sub>, respectively;  $k$  is the

apparent rate constant of the reaction. Since  $[O_2] \gg [CB]$ , the Eq. (3) can be rewritten as follows:

$$r = -\frac{d[CB]}{dt} = k_{ap}[CB]^n \quad (3)$$

Suppose this reaction obeys a first-order rate law, combining Eq. (1) and Eq. (3), and solving the resulting differential equation leads to Eq. (4):

$$\ln[1/(1-x)] = k'_{ap}\tau \quad (4)$$

Where  $\tau$  is the space time (s) and is defined as the reciprocal of the space velocity.

The apparent activation energy of the catalytic oxidation of *CB* over the two catalysts as calculated according to the Arrhenius equation (Eq. (5)):

$$\ln \frac{k'_{ap1}}{k'_{ap2}} = \frac{E_a}{R} \left( \frac{1}{T_2} - \frac{1}{T_1} \right) \quad (5)$$

Where  $k'_{ap1}$  and  $k'_{ap2}$  are the apparent rate constants at  $T_1$  and  $T_2$ , respectively,  $s^{-1}$ ;  $E_a$  is the apparent activation energy, kJ/mol; and  $T_1$  and  $T_2$  are the reaction temperatures, K.

The specific rates,  $r_{CB}$ , of 0.2 Ru ADCs and 0.2 Ru NPs were also compared based on equation (6):

$$r_{CB} = \frac{X}{m_{NM}} \times f_{CB} \quad (6)$$

Where  $m_{NM}$  is the mass of precious metals obtained by ICP analysis,  $f_{CB}$  is the molar gas velocity, mol h<sup>-1</sup>;  $x$  is the conversion rate of *CB*.

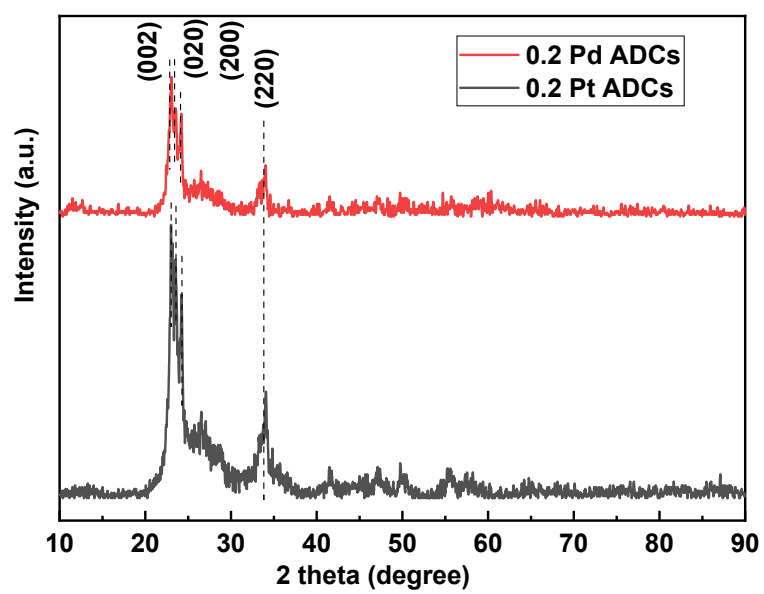

Fig. S1 XRD spectra of 0.2 Pd ADCs and 0.2 Pt ADCs.

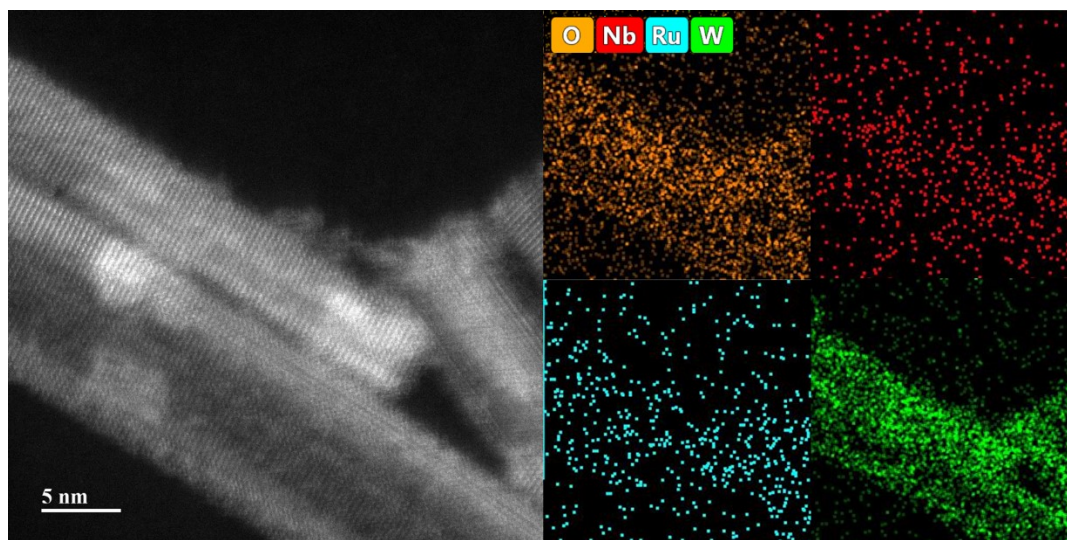

**Fig. S2.** ac-HAADF-STEM and EDS images of Ru NPs.

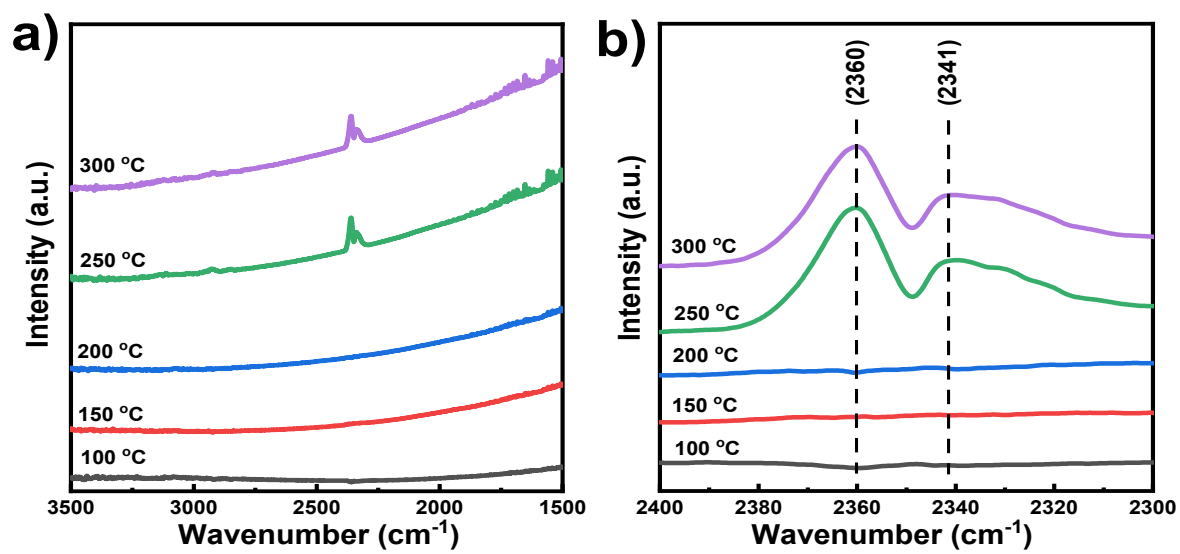

Fig. S3. *In-situ* FT-IR spectra of 0.2 Ru ADCs at different temperatures after 30 min.

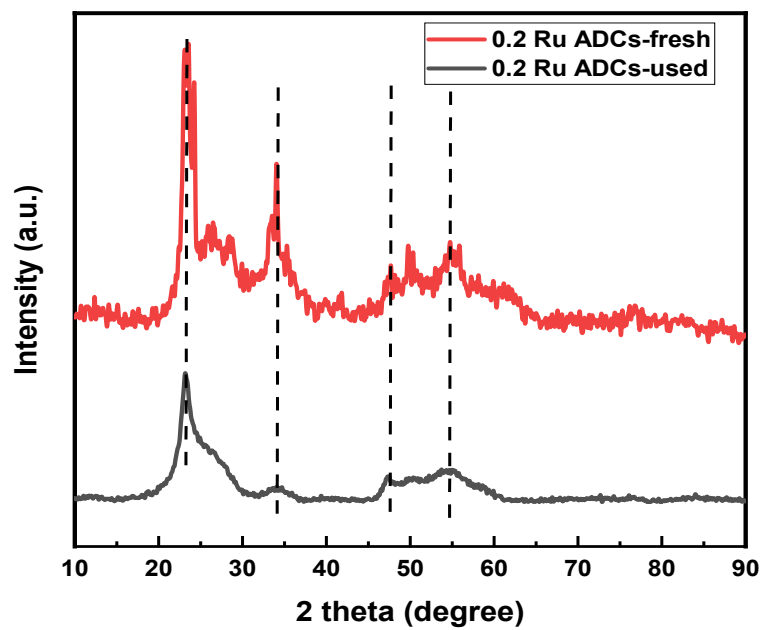

**Fig. S4.** XRD spectra of fresh 0.2 Ru ADCs and used 0.2 Ru ADCs.

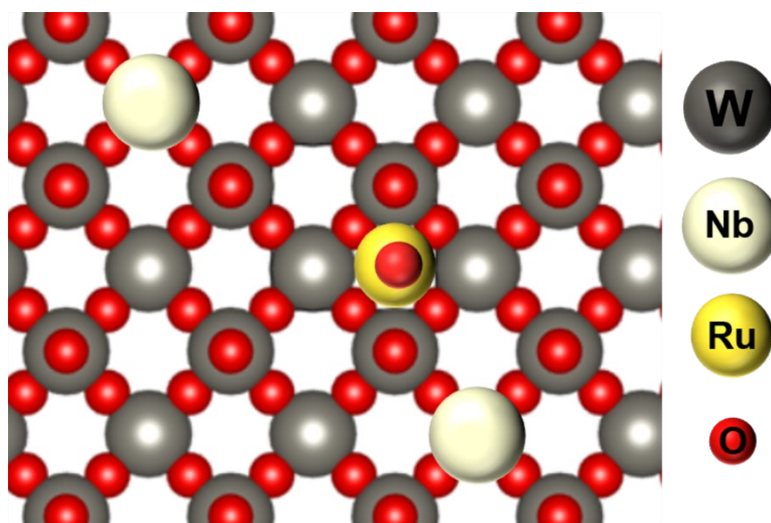

**Fig. S5.** Proposed crystal structure of atomically dispersed Ru supporting on Nb-WO<sub>x</sub>.
